# Supplementary material
Source: Springer Nature journal article supplement (https://www.springermedizin.de/resource/supplementary/13047_2010_140_MOESM3_ESM.pdf/9663232)

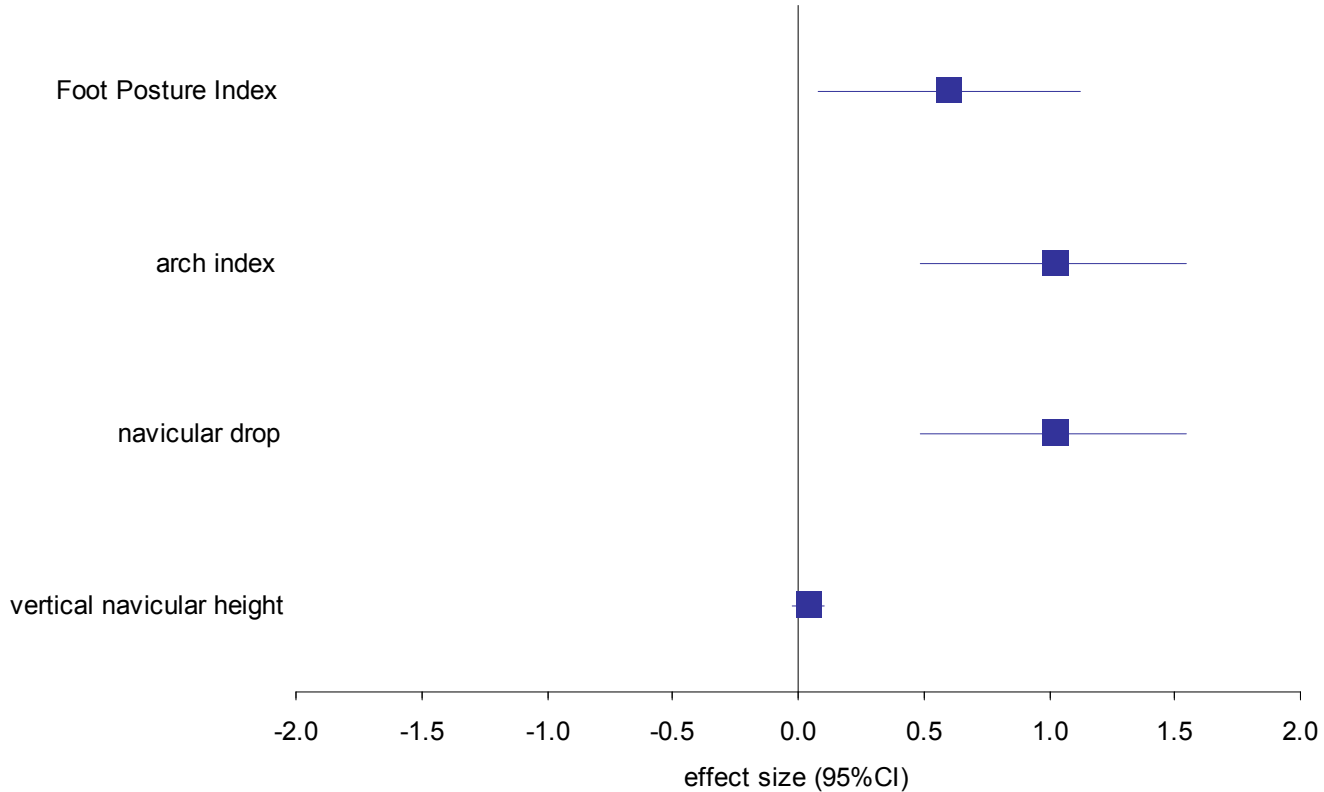

Supplement: MOESM3 [file 9663232]
